# Supplementary material
Source: PubMed Central journal article supplement (PMC6092745)
Supplement: NIHMS983153-supplement-1.pdf [file NIHMS983153-supplement-1.pdf]

## Supporting Information for

### Hydrogen and thiosulfate limits for growth of a thermophilic, autotrophic *Desulfurobacterium* species from a deep-sea hydrothermal vent

Lucy C. Stewart<sup>1</sup>, James G. Llewellyn<sup>1</sup>, David A. Butterfield<sup>2</sup>, Marvin D. Lilley<sup>3</sup> and James F. Holden<sup>1\*</sup>

<sup>1</sup>*Department of Microbiology, University of Massachusetts, Amherst, MA 01003, USA.*

<sup>2</sup>*Joint Institute for the Study of the Atmosphere and Ocean, University of Washington, Seattle, WA 98195, USA.*

<sup>3</sup>*School of Oceanography, University of Washington, Seattle, WA 98195, USA.*

\*For correspondence. E-mail [jholden@microbio.umass.edu](mailto:jholden@microbio.umass.edu); Tel. (+1) 413 577 1742; Fax (+1) 413 545 1578.

This file includes:

Figures S1 through S4

Tables S1 and S2

Experimental procedures

References

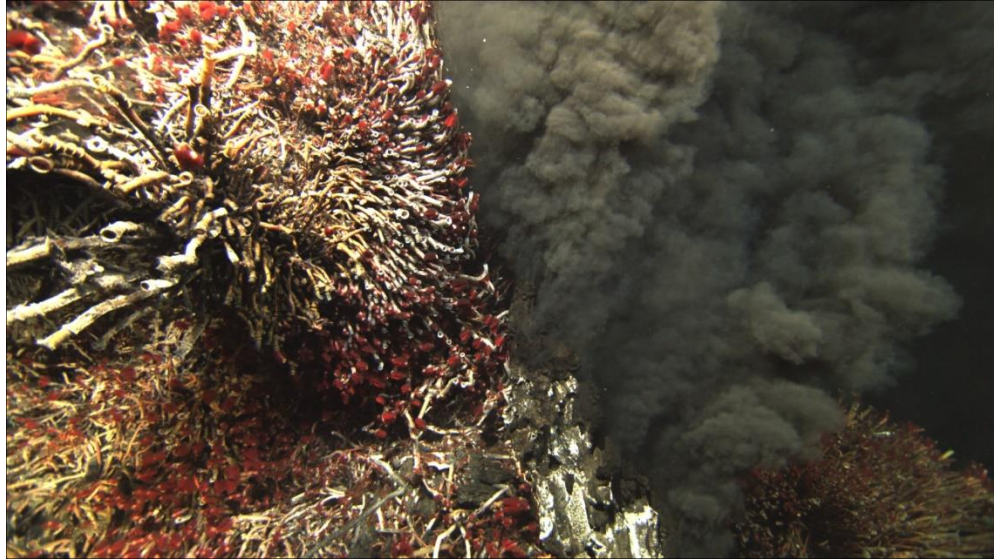

**Fig. S1.** Boardwalk hydrothermal vent sampling site showing the black smoker (bottom) that was the source of the 341°C hydrothermal fluid and the tubeworm mound (left side) that was the source of the 19°C fluid. The image is a video frame grab from ROV *Jason* dive J2-576.

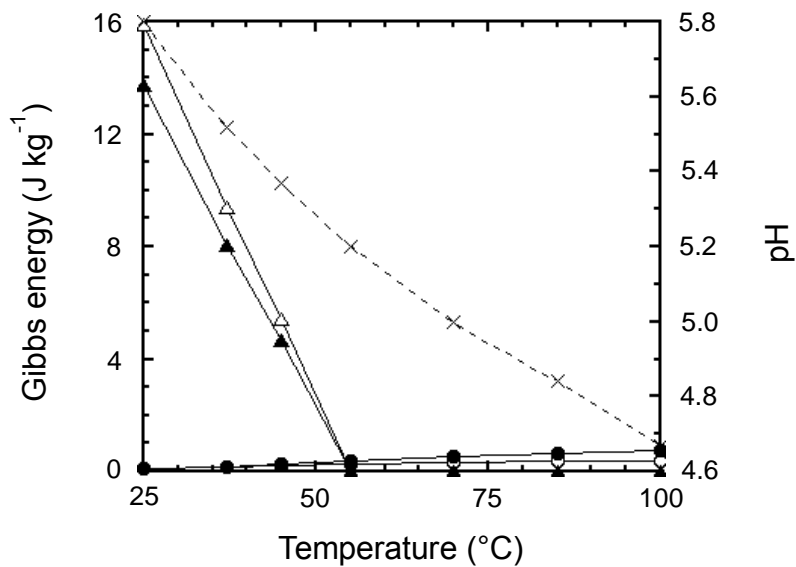

**Fig. S2.** Predicted catabolic energies (per kg of mixed fluid) available for hydrogenotrophic sulfate reduction (●), hydrogenotrophic methanogenesis (○), aerobic sulfide oxidation (▲), and aerobic methane oxidation (Δ) at varying temperatures in mixed abiotic hydrothermal-seawater solutions flowing from the Boardwalk edifice. The calculated pH for the mixed fluid is also shown (×).

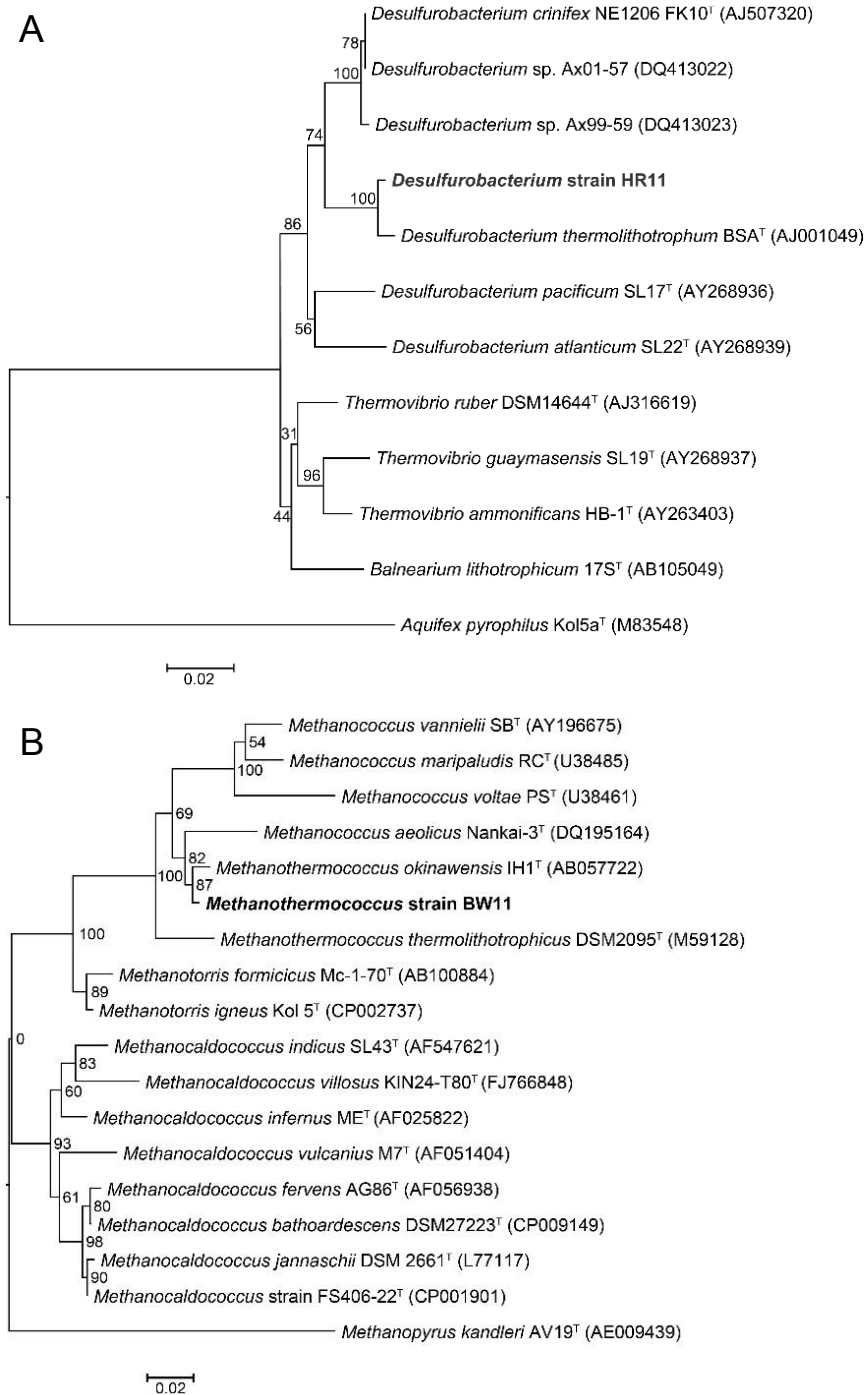

**Fig. S3.** Neighbour-joining trees showing the positions of (A) strain HR11 within the genus *Desulfurobacterium* (870 nt) and (B) strain BW11 within the genus *Methanothermococcus* (880 nt) based on sequences of the 16S rRNA gene. GenBank/EMBL/DDBJ accession numbers are included in parentheses. The topology of the tree was estimated by bootstraps based on 500 replications. Numbers at the branch point are the percentage support by bootstraps. Bar, 2% sequence divergence.

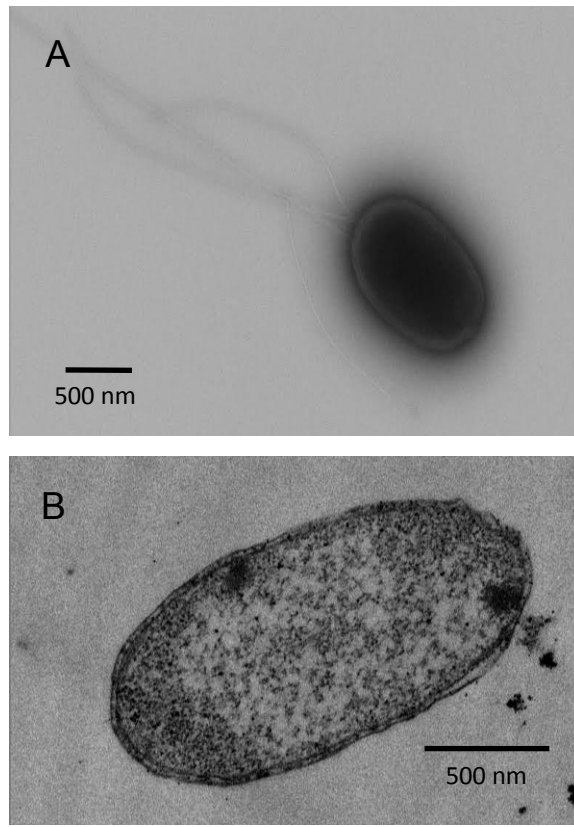

**Fig. S4.** Negative staining (A) and thin-section transmission electron micrographs of strain HR11. Bars, 500 nm.

**Table S1.** Characteristics of various global deep-sea hydrothermal vent sites and the presence or absence of *Desulfurobacterium* and *Methanococcales* species

|                                          | Boardwalk edifice, Endeavour Segment, Juan de Fuca Ridge | Hulk edifice, Endeavour Segment, Juan de Fuca Ridge | Axial Volcano, Juan de Fuca Ridge | Lucky Strike Field, Mid-Atlantic Ridge | Kilo Moana, Lau Basin | Mariner Field, Lau Basin | TOTO Caldera, Mariana Arc | Brothers Volcano, Kermadec Arc | Iheya North Field, Mid-Okinawa Trough | Kairei Field, Central Indian Ridge | Logatchev Field, Mid-Atlantic Ridge | Rainbow Field, Mid-Atlantic Ridge |
|------------------------------------------|----------------------------------------------------------|-----------------------------------------------------|-----------------------------------|----------------------------------------|-----------------------|--------------------------|---------------------------|--------------------------------|---------------------------------------|------------------------------------|-------------------------------------|-----------------------------------|
| Geologic setting <sup>a</sup>            | MORB                                                     | MORB                                                | MORB                              | MORB                                   | VA                    | VA                       | VA                        | VA                             | VA                                    | UM                                 | UM                                  | UM                                |
| Max. temp. (°C)                          | 341                                                      | 305                                                 | 275                               | 163-324                                | 290-304               | 338-359                  | 170                       | 290                            | 311                                   | 365                                | 300-350                             | 191-370                           |
| H <sub>2</sub> S (mM) <sup>b</sup>       | 3.4                                                      | NA                                                  | 37                                | 2.4-3.4                                | 3.5-3.9               | 6.1-19                   | 14.6                      | 7.9                            | 4.0                                   | 4.0                                | 0.3                                 | 1.8-3.3                           |
| H <sub>2</sub> (μM) <sup>b</sup>         | 79                                                       | 165                                                 | 600                               | 25-71                                  | 220-498               | 33-179                   | ~10                       | 17                             | ~200                                  | 2,500                              | 5,900                               | 12,300-16,900                     |
| H <sub>2</sub> (μM) at 72°C <sup>c</sup> | 17                                                       | 39                                                  | 158                               | 11-16                                  | 55-119                | 7-36                     | 4                         | 4                              | 47                                    | 496                                | >1,400                              | >4,600                            |
| <i>Desulfurobacterium</i>                | +                                                        | +                                                   | +                                 | -                                      | +                     | -                        | -                         | -                              | +                                     | +                                  | +                                   | +                                 |
| <i>Methanococcales</i>                   | +                                                        | +                                                   | +                                 | -                                      | +                     | +                        | -                         | -                              | +                                     | +                                  | +                                   | +                                 |
| References <sup>d</sup>                  | 1                                                        | 2,3                                                 | 4-6                               | 7                                      | 8                     | 8                        | 9                         | 10                             | 11                                    | 12                                 | 13                                  | 7                                 |

<sup>a</sup>Symbols and abbreviations: MORB, mid-ocean ridge basalt; VA, volcanic arc; UM, ultramafic; +, *Desulfurobacterium*- and *Methanococcales*- related 16S rRNA sequences found in the samples; n.d., none detected; NA, not available.

<sup>b</sup>End-member H<sub>2</sub> and CH<sub>4</sub> concentrations in hydrothermal fluids are based on an extrapolation of measured values to zero magnesium concentration.

<sup>c</sup>H<sub>2</sub> concentrations at 72°C are estimated assuming conserved mixing between 2°C seawater containing no H<sub>2</sub> and end-member hydrothermal fluid H<sub>2</sub>.

<sup>d</sup>References: 1, this study; 2, Anderson *et al.* (2013); 3, Ver Eecke *et al.* (2012); 4, Huber *et al.* (2002); 5, Huber *et al.* (2003); 6, Butterfield *et al.* (2004); 7, Flores *et al.* (2011); 8, Flores *et al.* (2012); 9, Nakagawa *et al.* (2006); 10, Takai *et al.* (2009); 11, Nakagawa *et al.* (2005); 12, Takai *et al.* (2004); and 13, Perner *et al.* (2007).

## Experimental procedures

### *Field sampling and chemical analyses*

In July 2011, 19°C and 341°C hydrothermal fluids were collected within a meter of each other on top of the Boardwalk edifice (Fig. S1) at a depth of 2,134 m in the High Rise vent field along the Endeavour Segment of the Juan de Fuca Ridge (47.968°N 129.087°W). For the 341°C fluids, duplicate samples were drawn into Tedlar plastic bags with valves within rigid housings using the NOAA Hydrothermal Fluid and Particle Sampler (Butterfield *et al.*, 2004) and titanium gas-tight samplers (Edmond *et al.*, 1992). For the 19°C fluid, the sample was drawn into another Tedlar plastic bag. The sampler pumped vent fluid through a titanium nozzle and recorded the temperature of the fluid within the intake nozzle once every second during pumping. Samples were collected using the research submarine *Jason II* operated from the research vessel *Thomas G. Thompson*. Fluid samples were analyzed on board ship for pH, alkalinity,  $\Sigma\text{H}_2\text{S}$ , dissolved silica, and  $\Sigma\text{NH}_3$ . The gases were extracted from the gas-tight samplers using a shipboard gas extraction line and sealed in glass ampules for later analysis by gas chromatography. The extraction water (acidified with sulfamic acid) was analyzed for major elements on shore. Major and minor elements in the hydrothermal fluids were analyzed at the Pacific Marine Environmental Laboratory and at the University of Washington as described previously (Edmond *et al.*, 1992; Butterfield *et al.*, 1997; 2004).

### *Redox energy estimates*

Four redox reactions were considered for microbial energy availability estimates (Table S2). Two represent aerobic respiration of inorganic electron donors (sulfide oxidation and methane oxidation) and two represent anaerobic respiration of  $\text{H}_2$  and inorganic electron acceptors (sulfate reduction and methanogenesis).

**Table S2.** Inorganic redox reactions (from Amend *et al.*, 2011)

| Metabolism                         | Reaction                                                                                            |
|------------------------------------|-----------------------------------------------------------------------------------------------------|
| Aerobic sulfide oxidation          | $\text{H}_2\text{S} + 2\text{O}_2 \rightarrow \text{SO}_4^{2-} + 2\text{H}^+$                       |
| Aerobic methane oxidation          | $\text{CH}_4 + 2\text{O}_2 \rightarrow \text{CO}_2 + 2\text{H}_2\text{O}$                           |
| Hydrogenotrophic sulfate reduction | $4\text{H}_2 + \text{SO}_4^{2-} + 2\text{H}^+ \rightarrow \text{H}_2\text{S} + 4\text{H}_2\text{O}$ |
| Hydrogenotrophic methanogenesis    | $4\text{H}_2 + \text{CO}_2 \rightarrow \text{CH}_4 + 2\text{H}_2\text{O}$                           |

All compounds were in the aqueous phase. The compositions of the mixed hydrothermal solutions were calculated from those of the end-member vent fluid from Boardwalk and seawater using the REACT module with its default settings in the computer code Geochemist's Workbench™ as previously described (Jin and Bethke, 2005; Amend *et al.*, 2011). The seawater composition was as previously described (Amend *et al.*, 2011), except  $\text{O}_2$  ( $70 \mu\text{mol kg}^{-1}$ ) that was based on  $\text{O}_2$  measurements at 2,200 m depth within the Endeavour Segment axial valley (Richard Thomson, personal communication). The reaction energetics of  $\text{H}_2$  oxidation coupled with the reduction of

thiosulfate or sulfur reduction could not be calculated since thiosulfate is not in the Geochemist's Workbench database and concentrations of thiosulfate and sulfur/polysulfide in vent systems are unknown.

The reaction path mimics the incremental titration of small aliquots of seawater into hot vent fluid with re-evaluation of the chemical speciation of the mixed solution at each step. All minerals were allowed to precipitate and dissolve in the model during mixing except quartz, tridymite, cristobalite, chalcedony, and talc (Jin and Bethke, 2005). Differences from Jin and Bethke (2005) were that talc precipitation was inhibited but hematite precipitation was permitted. H<sub>2</sub>, H<sub>2</sub>S, CH<sub>4</sub> and NH<sub>4</sub><sup>+</sup> were decoupled from redox reactions, but all other redox reactions were allowed. Values of Gibbs energy ( $\Delta G_r$ ) for the catabolic reactions were computed using the activities of relevant species as previously described (Amend et al., 2011). The amount of energy available (J) from catabolic reactions at 25°C, 37°C, 45°C, 55°C, 70°C, 85°C and 100°C in a kg of mixed fluid was calculated by multiplying the calculated Gibbs energy for the reaction at each temperature by the concentration of the reactant that was in limiting supply (Amend *et al.*, 2011). For comparison, the mixing reaction was also run for hydrothermal fluids and seawater as described by McCollom and Shock (1997) where all mineral precipitations were inhibited and H<sub>2</sub> and O<sub>2</sub> were in redox equilibrium. Under these modeling assumptions, O<sub>2</sub> was only depleted in the mixed hydrothermal fluid above 200°C and H<sub>2</sub> was depleted below 145°C, which means the fluids would be incapable of supporting anaerobic hydrogenotrophy at thermophilic growth temperatures.

#### *Isolation of new thermophile strains*

Hydrothermal fluid from the 19°C sample was immediately used to inoculate modified Deutsche Sammlung von Mikroorganismen und Zellkulturen (DSM) medium 282 (see below) and DSM medium 399 (Jones *et al.*, 1983; Burggraf *et al.*, 1990) for the growth of autotrophic sulfur reducers and methanogens. The samples were incubated shipboard at 55°C until they became turbid. Growth was confirmed using phase-contrast light microscopy, headspace analysis using gas chromatography, and sulfide production using the methylene blue method (Chen and Mortenson, 1977). Cells in the modified DSM 282 medium were predominantly rods that produced H<sub>2</sub>S and very little CH<sub>4</sub>, while those in the DSM 399 medium were predominantly cocci that produced CH<sub>4</sub>. On shore, purification of the strains from the 19°C hydrothermal fluid was performed by three rounds of 10-fold dilution-to-extinction incubations at 55°C using their original enrichment medium. They were identified through the partial sequencing of their 16S rRNA gene that had been amplified by PCR (see below). The result was the purification of *Desulfurobacterium* strain HR11 from the modified DSM 282 medium and *Methanothermococcus* strain BW11 from the DSM 399 medium. They were deposited in the DSM culture collection and assigned the collection numbers DSM 100454 and DSM 100453, respectively.

#### *Growth conditions*

The growth medium for all laboratory experiments, except where amended (see below), was DSM medium 282 (Jones *et al.*, 1983) that was modified by the addition of 0.1% (wt vol<sup>-1</sup>) Na<sub>2</sub>S<sub>2</sub>O<sub>3</sub>, the removal of Fe(NH<sub>4</sub>)<sub>2</sub>(SO<sub>4</sub>)<sub>2</sub>•6H<sub>2</sub>O, and the use of 0.64 mM dithiothreitol (DTT) as the reducing agent instead of Na<sub>2</sub>S•9H<sub>2</sub>O and cysteine-HCl. The

medium was pH balanced to  $6.00 \pm 0.05$ . Static cultures were grown in 10 ml of medium contained within Balch tubes sealed with butyl rubber stoppers with 2 atm of  $\text{H}_2/\text{CO}_2$  (80:20 ratio) headspace and incubated in a forced-air incubator. Strain HR11 was incubated at  $72^\circ\text{C}$  unless otherwise indicated.

### *Monod kinetics*

For the  $\text{H}_2$  and  $\text{Na}_2\text{S}_2\text{O}_3$  limitation experiments, a 2-L bioreactor stirred at 300 rpm with controls for gas flow, incubation temperature ( $72^\circ\text{C} \pm 0.1^\circ\text{C}$ ), and pH ( $6.0 \pm 0.1$  by the automatic addition of 0.25 mM HCl) was prepared with 1.5 L of modified DSM 282 medium. The reactor was degassed through a submerged fritted bubbler with a mixture of  $\text{CO}_2$  ( $7.5 \text{ mL of gas min}^{-1}$ ),  $\text{H}_2$ , and  $\text{N}_2$ . For the  $\text{H}_2$  limitation experiments, the  $\text{H}_2$  gas flow rate and  $\text{H}_2$  concentration were varied for different growth kinetics experiments. A  $\text{H}_2/\text{N}_2$  tank mixture (5:95 ratio) was used in place of pure  $\text{H}_2$  to attain  $\text{H}_2$  concentrations below  $20 \mu\text{M}$ .  $\text{N}_2$  was added to balance the total gas flow at  $70 \text{ mL min}^{-1}$ . The aqueous  $\text{H}_2$  concentration in the reactor at all  $\text{H}_2$  flow rate settings was measured by drawing  $\sim 20 \text{ mL}$  of fluid from the bottom of the reactor directly into anoxic 60-mL serum bottles with 20 mL of gas removed and measuring the headspace in the bottle with a gas chromatograph equipped with a thermal conductivity detector. For the  $\text{Na}_2\text{S}_2\text{O}_3$  limitation experiments, the given concentration is for the initial concentration in the reactor. The reactor was inoculated with a logarithmic growth-phase culture of strain HR11. During growth, samples were drawn from the reactor and cell concentrations were determined using phase-contrast light microscopy and a Petroff-Hausser counting chamber. Specific growth rates ( $\mu$ ) were estimated using a best-fit curve through the exponential portion of growth. Each growth kinetic experiment was run in duplicate.

### *Cell characteristics*

For kinetic experiments, at least 10 Balch tubes were inoculated concurrently with a logarithmic growth phase culture grown under the same experimental conditions. At various time points, at least two tubes were permanently removed from incubation. Cell concentrations were determined using a Petroff-Hausser counting chamber and phase-contrast light microscopy. Specific growth rates were calculated using a best-fit exponential curve to the logarithmic portion of cell growth. The amount of  $\text{H}_2\text{S}$  produced was determined spectrophotometry by adding 0.1 N NaOH to each tube and then using the methylene blue method. Confidence intervals (95%) were calculated for growth rates as described previously (Zar, 1996).

*Desulfurobacterium* strain HR11 was grown at pH 4 (no buffer), pH 5 and 6 (5 mM MES buffer), pH 7 and 8 (20 mM PIPES buffer), and pH 8.5 and 9 (30 mM  $\text{NaHCO}_3$  buffer) to determine the effect of pH on growth. It was also grown on 0-5% (wt vol<sup>-1</sup>) NaCl to determine the effect of salt on growth. Elemental sulfur (0.2% wt vol<sup>-1</sup>), 10 mM  $\text{NaSO}_3$ , 20 mM  $\text{Na}_2\text{SO}_4$ , 20 mM ferric citrate, 100 mmol L<sup>-1</sup> amorphous Fe(III) (oxy)hydroxide, and 20 mM  $\text{KNO}_3$  were tested separately in place of  $\text{Na}_2\text{S}_2\text{O}_3$  as terminal electron acceptors. Yeast extract (0.2% wt vol<sup>-1</sup>), 10 mM maltose, 10 mM tryptone, 10 mM sodium acetate, and 10 mM sodium formate were tested separately as carbon and electron donors using 2 atm of  $\text{N}_2/\text{CO}_2$  (80:20 ratio) and  $\text{H}_2$  only in the headspace. All tests were done in duplicate, and positive cultures were transferred three times on the same substrate to confirm growth.



### *Phylogenetic analyses*

DNA was extracted from strain HR11 and BW11 using a genomic DNA extraction kit (Qiagen) and their 16S rRNA genes were amplified using the polymerase chain reaction and sequenced. The primers used were 8f (5'-AGA GTT TGA TCC TGG CTC A-3') and 1492r (5'-TAC CTT GTT ACG ACT T-3'). Phylogenetic trees were constructed using 16S rRNA gene sequences from the Ribosomal Database Project (Cole *et al.*, 2007) in MEGA 5 (Tamura *et al.*, 2011) using a neighbor-joining algorithm. Both sequences are deposited in GenBank under accession numbers KR023948-KR023949.

### *Electron microscopy*

For negative staining of whole mounted cells, 10 ml of culture within a sealed Balch tube were fixed by adding 0.2 ml of 50% glutaraldehyde with gentle mixing and incubating at room temperature for 1 h. An aliquot (3 ml) of the fixed culture was then removed from the sealed Balch tube, processed, and applied to plasma-treated carbon films (ca. 0.5 nm thickness) on 400 mesh copper grids. The grids were stained with 3% NH<sub>4</sub>OH and 2% aqueous uranyl acetate and viewed with a JEOL-100S transmission electron microscope.

For thin section microscopy, 10 ml of culture within a sealed Balch tube were fixed by adding 0.4 ml of 50% glutaraldehyde with gentle mixing and incubating at room temperature for 2 h. An aliquot (3 ml) of the fixed culture was then removed from the sealed Balch tube, post fixed, and enrobed by resuspension in a minimal volume of 2% type IX agarose to create a non-friable unit rich in cells. The agarose was then gelled and cut into 1 mm blocks with a razor blade. These blocks were then rinsed in dH<sub>2</sub>O, dehydrated, infiltrated with Ellis-Spurrs low-viscosity epoxy resin formulation (Ellis, 2006). Polymerized blocks were sectioned on a diamond knife set at 60 nm thickness. Sections were stained with 2% aqueous uranyl acetate and alkaline lead citrate (5 mg ml<sup>-1</sup> in 0.1 N NaOH). Sections were viewed on a JEOL 100S transmission electron microscope.

### **References**

- Amend, J.P., McCollom, T.M., Hentscher, M., and Bach, W. (2011) Catabolic and anabolic energy for chemolithoautotrophs in deep-sea hydrothermal systems hosted in different rock types. *Geochim Cosmochim Acta* 75: 5736-5748.
- Anderson, R.E., Torres Beltrán, M., Hallam, S.J., and Baross, J.A. (2013) Microbial community structure across fluid gradients in the Juan de Fuca Ridge hydrothermal system. *FEMS Microbiol Ecol* 83: 324-339.
- Burggraf, S., Jannasch, H., Nicolaus, B., and Stetter, K.O. (1990) *Archaeoglobus profundus* sp. nov., represents a new species within the sulfate-reducing archaeobacteria. *Syst Appl Microbiol* 13: 24-28.
- Butterfield, D.A., Jonasson, I.R., Massoth, G.J., Feely, R.A., Roe, K.K., Embley, R.E., *et al.* (1997) Seafloor eruptions and evolution of hydrothermal fluid chemistry. *Phil Trans R Soc Lond A* 355: 369-386.
- Butterfield, D.A., Roe, K.K., Lilley, M.D., Huber, J.A., Baross, J.A., Embley, R.W., and Massoth, G.J. (2004) Mixing, reaction and microbial activity in the sub-seafloor revealed by temporal and spatial variation in diffuse flow vents at Axial Volcano. In

- The Subseafloor Biosphere at Mid-Ocean Ridges. Wilcock, W.S.D., DeLong, E.F., Kelley, D.S., Baross, J.A., and Cary, S.C. (eds.). Washington, DC, USA: American Geophysical Union, pp. 269-289.
- Chen, J.S., and Mortenson, L.E. (1977) Inhibition of methylene blue formation during determination of acid-labile sulfide of iron-sulfur protein samples containing dithionite. *Anal Biochem* 79: 157-165.
- Cole, J.R., Chai, B., Farris, R.J., Wang, Q., Kulam-Syed-Mohideen, A.S., McGarrell, D.M., *et al.* (2007) The ribosomal database project (RDP-II): Introducing myRDP space and quality controlled public data. *Nucleic Acids Res* 35: D169-172.
- Edmond, J.M., Massoth, G.J., and Lilley, M.D. (1992) Submersible-deployed samplers for axial vent waters. *RIDGE Events* 3: 23-24.
- Ellis, E.A. (2006) Solutions to the problem of substitution of ERL 4221 for vinyl cyclohexene dioxide in Spurr low viscosity embedding formulations. *Microscopy Today* 14:32-33.
- Flores, G.E., Campbell, J.H., Kirshtein, J.D., Meneghin, J., Podar, M., Steinberg, J.I., *et al.* (2011) Microbial community structure of hydrothermal deposits from geochemically different vent fields along the Mid-Atlantic Ridge. *Environ Microbiol* 13: 2158-2171.
- Flores, G.E., Shakya, M., Meneghin, J., Yang, Z.K., Seewald, J.S., Wheat, C.G., *et al.* (2012) Inter-field variability in the microbial communities of hydrothermal vent deposits from a back-arc basin. *Geobiology* 10: 333-346.
- Huber, J.A., Butterfield, D.A., and Baross, J.A. (2002) Temporal changes in archaeal diversity and chemistry in a mid-ocean ridge subseafloor habitat. *Appl Environ Microbiol* 68: 1585-1594.
- Huber, J.A., Butterfield, D.A., and Baross, J.A. (2003) Bacterial diversity in a subseafloor habitat following a deep-sea volcanic eruption. *FEMS Microbiol Ecol* 43: 393-409.
- Jin, Q., and Bethke, C.M. (2005) Predicting the rate of microbial respiration in geochemical environments, *Geochim Cosmochim Acta* 69: 1133-1143.
- Jones, W.J., Leigh, J.A., Mayer, F., Woese, C.R., and Wolfe, R.S. (1983) *Methanococcus jannaschii* sp. nov., an extremely thermophilic methanogen from a submarine hydrothermal vent. *Arch Microbiol* 136: 254-261.
- McCollom, T.M., and Shock, E.L. (1997) Geochemical constraints on chemolithoautotrophic metabolism by microorganisms in seafloor hydrothermal systems. *Geochim Cosmochim Acta* 61: 4375-4391.
- Nakagawa, S., Takai, K., Inagaki, F., Chiba, H., Ishibashi, J., Kataoka, S., *et al.* (2005) Variability in microbial community and venting chemistry in a sediment-hosted backarc hydrothermal system: Impacts of subseafloor phase-separation. *FEMS Microbiol Ecol* 54: 141-55.
- Nakagawa, T., Takai, K., Suzuki, Y., Hirayama, H., Konno, U., Tsunogai, U., and Horikoshi, K. (2006) Geomicrobiological exploration and characterization of a novel deep-sea hydrothermal system at the TOTO caldera in the Mariana Volcanic Arc. *Environ Microbiol* 8: 37-49.
- Perner, M., Kuever, J., Seifert, R., Pape, T., Koschinsky, A., Schmidt, K., *et al.* (2007) The influence of ultramafic rocks on microbial communities at the Logatchev

- hydrothermal field, located 15 degrees N on the Mid-Atlantic Ridge. *FEMS Microbiol Ecol* 61: 97-109.
- Takai, K., Gamo, T., Tsunogai, U., Nakayama, N., Hirayama, H., Nealson, K.H., and Horikoshi, K. (2004) Geochemical and microbiological evidence for a hydrogen-based, hyperthermophilic subsurface lithoautotrophic microbial ecosystem (HyperSLiME) beneath an active deep-sea hydrothermal field. *Extremophiles* 8: 269-82.
- Takai, K., Nunoura, T., Horikoshi, K., Shibuya, T., Nakamura, K., Suzuki, Y., *et al.* (2009) Variability in microbial communities in black smoker chimneys at the NW caldera vent field, Brothers Volcano, Kermadec Arc. *Geomicrobiol J* 26: 552-569.
- Tamura, K., Peterson, D., Peterson, N., Stecher, G., Nei, M., and Kumar, S. (2011) MEGA5: molecular evolutionary genetics analysis using maximum likelihood, evolutionary distance, and maximum parsimony methods. *Mol Biol Evol* 28: 2731-2739.
- Ver Eecke, H.C., Butterfield, D.A., Huber, J.A., Lilley, M.D., Olson, E.J., Roe, K.K., *et al.* (2012) Hydrogen-limited growth of hyperthermophilic methanogens at deep-sea hydrothermal vents. *Proc Natl Acad Sci USA* 109: 13,674-13,679.
- Zar, J.H. (1996) *Biostatistical Analysis*, 3<sup>rd</sup> Edition. Prentice Hall, Upper Saddle River, N.J.
